# Supplementary material
Source: publisher figshare collection journal article supplement (https://karger.figshare.com/ndownloader/files/38311284)
Supplement: Supplementary file 1 [file 38311284]

| **Study** | **Study Selection (Max 4*)** | **Comparability (Max 2*)** | **Exposure**  **(Max 3*)** | **Total** |
| --- | --- | --- | --- | --- |
| Dorado L 2013 [14] | **** | * | *** | 8 |
| Sébastien S 2013 [15] | **** | * | *** | 8 |
| Kim JM 2015 2017 [16] | *** | * | *** | 7 |
| Raychev R 2015 [17] | *** | * | *** | 7 |
| Jiang SW 2015 [18] | **** | * | *** | 8 |
| Kass-Hout T 2016 [19] | **** | ** | *** | 9 |
| Hao YH 2017 [20] | **** | ** | *** | 9 |
| Sugiura Y 2017 [21] | **** | * | *** | 8 |
| Huang XJ 2019 [22] | **** | * | *** | 8 |
| Kim TJ 2019 [23] | **** | * | *** | 8 |
| Neuberger PK 2019 [24] | *** | * | *** | 7 |
| Semerano A 2019 [25] | *** | * | *** | 7 |
| Desai SM 2019 [26] | **** | * | *** | 8 |
| Cappellari M 2020 [27] | *** | * | ** | 6 |
| Ducroux C 2020 [28] | **** | ** | *** | 9 |
| Goldhoorn RJB 2020 [29] | *** | ** | *** | 8 |
| Li FF 2020 [30] | *** | * | *** | 7 |
| Ramos-Araque ME 2020 [31] | *** | * | *** | 7 |
| Zhang XH 2020 [32] | *** | * | *** | 7 |
| Couture M [33] | **** | * | *** | 8 |
| Kim TJ 2021 [34] | *** | * | *** | 7 |
| Suzuki K 2021 [35] | **** | ** | *** | 9 |
| Shen HX 2021 [36] | **** | * | *** | 8 |
| Venditti L 2021 [37] | *** | * | *** | 7 |
| Yu X 2021 [38] | *** | * | *** | 7 |

**eTable 1 in the Supplementary. The quality assessment of included studies by using the Newcastle–Ottawa Scale (NOS) of cohort studies**
